# Supplementary material
Source: publisher figshare collection journal article supplement (https://gsapubs.figshare.com/ndownloader/files/23293760)
Supplement: Supplementary file 1 [file 23293760]

GSA Today, v. 22, no. 6, doi: 10.1130/GSATG144A.1.

**Wave-cut or water-table platforms of rocky coasts and rivers?****Gregory J. Retallack** (gregr@uoregon.edu) and **Joshua J. Roering**

Dept. of Geological Sciences, University of Oregon, Eugene, Oregon 97403, USA

**Table 1.** Statistical comparisons of rock platforms and flanking cliffs

| Locality   | Lithology | Measure          | Platform mean $\pm$ standard deviation (number) | Cliff mean $\pm$ standard deviation (number) | Similarity t-test probability | Similarity t-test $p < 0.01$ |
|------------|-----------|------------------|-------------------------------------------------|----------------------------------------------|-------------------------------|------------------------------|
| Sunset Bay | shale     | Schmidt hardness | $17.2 \pm 4.0$ (76)                             | $10.4 \pm 1.2$ (162)                         | $1.67 \cdot 10^{-21}$         | yes                          |
| Sunset Bay | shale     | slaking %        | $65.7 \pm 5.0$ (5)                              | $46.5 \pm 12.3$ (8)                          | $1.56 \cdot 10^{-3}$          | yes                          |
| Sunset Bay | shale     | hue              | $14.5 \pm 1.1$ (5)                              | $8.1 \pm 2.1$ (8)                            | $6.95 \cdot 10^{-6}$          | yes                          |
| Sunset Bay | shale     | bulk density     | $2.22 \pm 0.04$ (5)                             | $2.22 \pm 0.04$ (8)                          | 0.95                          | no                           |
| Sunset Bay | sandstone | Schmidt hardness | $16.4 \pm 3.6$ (35)                             | $12.4 \pm 3.9$ (229)                         | $2.29 \cdot 10^{-7}$          | yes                          |
| Sunset Bay | sandstone | slaking %        | $97.6 \pm 4.6$ (3)                              | $97.1 \pm 3.8$ (8)                           | 0.85                          | no                           |
| Sunset Bay | sandstone | hue              | $15.0 \pm 0$ (3)                                | $8.9 \pm 2.5$ (8)                            | $8.95 \cdot 10^{-5}$          | yes                          |
| Sunset Bay | sandstone | bulk density     | $2.11 \pm 0.04$ (3)                             | $2.20 \pm 0.11$ (8)                          | 0.11                          | no                           |
| Days Creek | shale     | Schmidt hardness | $21.4 \pm 9.4$ (120)                            | $10.4 \pm 1.9$ (270)                         | $3.24 \cdot 10^{-24}$         | yes                          |
| Days Creek | shale     | slaking %        | $98.8 \pm 2.2$ (5)                              | $33.2 \pm 14.0$ (8)                          | $1.74 \cdot 10^{-4}$          | yes                          |
| Days Creek | shale     | hue              | $15.0 \pm 0$ (5)                                | $11.4 \pm 2.1$ (8)                           | $1.55 \cdot 10^{-4}$          | yes                          |
| Days Creek | shale     | bulk density     | $2.59 \pm 0.1$ (5)                              | $2.55 \pm 0.02$ (8)                          | $1.68 \cdot 10^{-3}$          | yes                          |
| Days Creek | sandstone | Schmidt hardness | $34.2 \pm 12.4$ (150)                           | $11.0 \pm 2.7$ (270)                         | $3.61 \cdot 10^{-51}$         | yes                          |
| Days Creek | sandstone | slaking %        | $99.2 \pm 0.7$ (5)                              | $99.1 \pm 1.1$ (8)                           | 0.93                          | no                           |
| Days Creek | sandstone | hue              | $15.0 \pm 0$ (5)                                | $11.4 \pm 2.2$ (8)                           | $1.17 \cdot 10^{-3}$          | yes                          |
| Days Creek | sandstone | bulk density     | $2.61 \pm 0.04$ (5)                             | $2.53 \pm 0.09$ (8)                          | 0.04                          | no                           |

# GSA Data Repository item 2012153

**Table 2.** Field and analytical data for samples of shale from Sunset Bay, Oregon.

| Sample | Munsell hue                                                          | Rock                                        | Intertidal zones                                                                          | Level vs. MSL (m) | Horizontal distance (m) | Ferran hue (Munsell) | Schmidt recoil ( <i>R</i> ) | Pre-slaking size (mm) | Slaked size (%) | Density (g.cm <sup>-3</sup> ) |
|--------|----------------------------------------------------------------------|---------------------------------------------|-------------------------------------------------------------------------------------------|-------------------|-------------------------|----------------------|-----------------------------|-----------------------|-----------------|-------------------------------|
| SH1    | dark bluish gray 10B3/1                                              | massive gray shale low (<1 m) on platform   | low intertidal with <i>Penitella penita</i> , <i>Adula falcata</i> , and sea weeds common | -1.9              | 89.4                    | 15                   | 18.5 ± 3.1                  | 60.6                  | 64.4 ± 8.8      | 2.19                          |
| SH2    | dark bluish gray 10B3/1                                              | massive gray shale low (<1 m) on platform   | low intertidal with <i>Penitella penita</i> , <i>Adula falcata</i> , and sea weeds common | -1.4              | 86.2                    | 15                   |                             | 51.4                  | 78.1 ± 12.0     | 2.22                          |
| SH3    | dark bluish gray 10B3/1                                              | massive gray shale low (<1 m) on platform   | mid-intertidal with seaweeds common                                                       | -1.1              | 84.5                    | 15                   | 14.9 ± 3.3                  | 54.3                  | 72.6 ± 17.5     | 2.11                          |
| SH4    | dark bluish gray 10B4/1                                              | massive gray shale                          | mid- intertidal with seaweeds common                                                      | 0.1               | 74.9                    | 15                   | 16.5 ± 2.6                  | 51                    | 73.8 ± 9.4      | 2.27                          |
| SH5    | dark bluish gray 10B4/1                                              | gray shale                                  | upper intertidal with limpets and periwinkles                                             | 0.6               | 45.3                    | 15                   | 20.6 ± 2.8                  | 67.1                  | 63.6 ± 6.2      | 2.25                          |
| SH6    | dark bluish gray 10B4/1                                              | gray shale                                  | upper intertidal with limpets and periwinkles                                             | 1.1               | 27.2                    | 15                   | 19.4 ± 3.1                  | 55.8                  | 62.4 ± 10.7     | 2.19                          |
| SH7    | dark bluish gray 10B4/1                                              | gray shale                                  | upper intertidal with limpets and periwinkles                                             | 1.7               | 14.9                    | 15                   | 12.3 ± 1.9                  | 62.6                  | 61.5 ± 14.2     | 2.19                          |
| SH8    | dark bluish gray 10B4/1 with 1 mm ferrans dark grayish brown 2.5Y4/2 | slaking gray shale in slope break seep zone | upper intertidal with limpets and periwinkles                                             | 2.0               | 13.1                    | 12.5                 | 11.0 ± 2.0                  | 57.6                  | 67.2 ± 33.3     | 2.20                          |
| SH9    | dark bluish gray 10B4/1 with 1 mm ferrans dark grayish brown 2.5Y4/2 | slaking gray shale in slope break seep zone | spray zone with limpets and lichens                                                       | 2.4               | 12.7                    | 12.5                 | 10.2 ± 0.6                  | 60.9                  | 70.5 ± 21.7     | 2.23                          |
| SH10   | dark bluish gray 10B4/1 with 1 mm ferrans brownish yellow 10YR6/6    | slaking gray shale                          | spray zone with limpets and lichens                                                       | 2.7               | 11.7                    | 10                   | 10.8 ± 1.4                  | 60.3                  | 44.0 ± 11.6     | 2.22                          |
| SH11   | dark bluish gray 10B4/1 with 1 mm ferrans strong brown 7.5YR5/6      | slaking gray shale                          | spray zone with lichens                                                                   | 3.2               | 10.5                    | 7.5                  | 10.2 ± 0.7                  | 60.1                  | 32.4 ± 11.7     | 2.28                          |
| SH12   | dark bluish gray 10B4/1 with 1 mm ferrans strong brown 7.5YR5/6      | slaking gray shale with ferrans             | bare rock with lichens and some grassy cover                                              | 4.2               | 7.5                     | 7.5                  |                             | 62.8                  | 37.1 ± 13.5     | 2.27                          |
| SH13   | dark bluish gray 10B4/1 with 1 mm ferrans strong brown 7.5YR4/6      | slaking gray shale with ferrans             | bare rock with lichens and some grassy cover                                              | 5.0               | 6.8                     | 7.5                  |                             | 41.8                  | 53.7 ± 12.5     | 2.23                          |
| SH14   | dark bluish gray 10B4/1 with 1 mm ferrans strong brown 7.5YR4/6      | slaking gray shale with ferrans             | bare rock with lichens and some grassy cover                                              | 6.0               | 5.7                     | 7.5                  |                             | 53.1                  | 53.6 ± 15.1     | 2.21                          |
| SH15   | dark bluish gray 10B4/1 with 1 mm ferrans strong brown 7.5YR4/6      | slaking gray shale with ferrans             | bare rock with lichens and some grassy cover                                              | 7.5               | 4.5                     | 7.5                  |                             | 64.6                  | 53.3 ± 9.7      | 2.16                          |
| SH16   | dark bluish gray 10B4/1 with 1 mm ferrans strong brown 7.5YR4/6      | slaking gray shale with ferrans             | bare rock with lichens and some grassy cover                                              | 9.1               | 3.6                     | 7.5                  |                             | 51.6                  | 37.0 ± 13.5     | 2.16                          |
| SH17   | dark bluish gray 10B4/1 with 3 mm ferrans yellowish red 5YR5/6       | red mottled gray shale                      | bare rock with lichens and some grassy cover                                              | 11.5              | 2.1                     | 5                    |                             | 57.7                  | 36.5 ± 11.6     | 2.22                          |

**Note:** Mean sea level was calculated from tide level at Sunset Bay at 8.02 hrs, 13-Jul-2010, taken as -0.67 at Charleston tide gauge<sup>9</sup>, with vertical and horizontal distances measured with level and tape. Munsell hues show redness with lower values on a scale in which 5Y is 15 and 5YR is 5. Schmidt recoil values (*R*) and percentage size change after 4 cycles of slaking experiment are given as mean and standard deviation. Bulk densities were measured using the clod method<sup>13</sup> and have standard deviation of 0.02 g.cm<sup>-3</sup>.

**Table 3. Field and analytical data for samples of sandstone from Sunset Bay, Oregon.**

| Sample | Munsell colour                                                              | Rock                                      | Intertidal zones                                                                          | Level vs. MSL (m) | Horizontal distance (m) | Ferran hue (Munsell) | Schmidt recoil (R) | Preslaking size (mm) | Slaked size (%) | Density (g.cm <sup>-3</sup> ) |
|--------|-----------------------------------------------------------------------------|-------------------------------------------|-------------------------------------------------------------------------------------------|-------------------|-------------------------|----------------------|--------------------|----------------------|-----------------|-------------------------------|
| SS1    | dark bluish gray 10B4/1 with diffusion ferran 4 mm thick olive gray 5Y4/2   | sandstone low (<1 m) on platform          | low intertidal with <i>Penitella penita</i> , <i>Adula falcata</i> , and sea weeds common | -1.9              | 89.4                    | 15                   | 22.5 ± 3.5         | 64.6                 | 100 ± 0         | 2.14                          |
| SS2    | dark bluish gray 10B4/1 with diffusion ferran 4 mm thick olive gray 5Y4/2   | sandstone low (<1 m) on platform          | low intertidal with <i>Penitella penita</i> , <i>Adula falcata</i> , and sea weeds common | -1.4              | 86.2                    | 15                   |                    | 65.9                 | 100 ± 0         | 2.05                          |
| SS3    | dark bluish gray 10B4/1 with diffusion ferran 4 mm thick olive gray 5Y4/2   | sandstone low (<1 m) on platform          | mid-intertidal with seaweeds common                                                       | -1.1              | 84.5                    | 15                   |                    | 55.2                 | 100 ± 0         | 2.13                          |
| SS4    | bluish gray 10B5/1 with diffusion ferran 2 mm thick olive gray 5Y4/2        | sandstone wall (1 m) with rare ferrans    | mid- intertidal with seaweeds common                                                      | 0.1               | 74.9                    | 15                   | 18.7 ± 2.2         | 68.6                 | 100 ± 0         | 2.12                          |
| SS5    | bluish gray 10B5/1 with diffusion ferran 2 mm thick yellowish brown 10YR5/6 | common ferrans in sandstone wall to 1.4 m | upper intertidal with limpets and periwinkles                                             | 0.6               | 45.3                    | 10                   | 20.9 ± 3.9         | 56.4                 | 100 ± 0         | 2.17                          |
| SS6    | bluish gray 10B5/1 with diffusion ferran 2 mm thick yellowish brown 10YR5/6 | common ferrans in sandstone wall to 2 m   | upper intertidal with limpets and periwinkles                                             | 1.1               | 27.2                    | 10                   | 27.6 ± 4.0         | 64.1                 | 100 ± 0         | 2.42                          |
| SS7    | bluish gray 10B5/1 with diffusion ferran 2 mm thick strong brown 7.5YR5/6   | common ferrans in sandstone wall to 3 m   | upper intertidal with limpets and periwinkles                                             | 1.7               | 14.9                    | 7.5                  | 24.1 ± 4.0         | 56.1                 | 92.2 ± 16.4     | 2.12                          |
| SS8    | bluish gray 10B5/1 with diffusion ferran 2 mm thick strong brown 7.5YR5/6   | case hardened sandstone wall to 3 m       | upper intertidal with limpets and periwinkles                                             | 2.0               | 13.1                    | 7.5                  | 20.5 ± 2.6         | 57.1                 | 91.6 ± 25.9     | 2.17                          |
| SS9    | bluish gray 10B5/1 with diffusion ferran 2 mm thick strong brown 7.5YR5/6   | case hardened sandstone wall              | spray zone with limpets and lichens                                                       | 2.4               | 12.7                    | 7.5                  | 25.2 ± 2.8         | 56.8                 | 100 ± 0         | 2.12                          |
| SS10   | bluish gray 10B5/1 with diffusion ferran 2 mm thick strong brown 7.5YR5/6   | case hardened sandstone wall              | spray zone with limpets and lichens                                                       | 2.7               | 11.7                    | 7.5                  | 21.7 ± 6.1         | 53.3                 | 100 ± 0         | 2.12                          |
| SS11   | greenish gray 5GY5/1 with diffusion ferran 2 mm thick strong brown 7.5YR5/6 | case hardened sandstone wall              | spray zone with lichens                                                                   | 3.2               | 10.5                    | 7.5                  |                    | 57.1                 | 100 ± 0         | 2.34                          |
| SS12   | greenish gray 5GY5/1 with diffusion ferran 2 mm thick strong brown 7.5YR5/6 | case hardened sandstone wall              | bare rock with lichens and some grassy cover                                              | 4.2               | 7.5                     | 7.5                  |                    | 63.7                 | 100 ± 0         | 2.18                          |

**Note:** Mean sea level was calculated from tide level at Sunset Bay at 8.02 hrs 13-Jul-2010 of -0.67 at Charleston tide gauge<sup>9</sup>, with vertical and horizontal distances measured with level and tape. Munsell hues show redness with lower values on a scale in which 5Y is 15 and 5YR is 5. Schmidt recoil values (R) and percentage size change after 4 cycles of slaking experiment are given as mean and standard deviation. Bulk densities were measured using the clod method<sup>13</sup> and have standard deviation of 0.02 g.cm<sup>-3</sup>.

# GSA Data Repository item 2012153

**Table 4.** Field and analytical data for samples of shale from Days Creek, Oregon.

| Sample | Munsell color                                                    | Rock                | Vegetation zones                                                                       | Level vs. water<br>18-Jul-2010<br>(m) | Horizontal<br>distance (m) | Ferran hue<br>(Munsell) | Schmidt<br>recoil (R) | Pre-slaking size<br>(mm) | Slaked size<br>(%) | Density<br>(g.cm <sup>-3</sup> ) |
|--------|------------------------------------------------------------------|---------------------|----------------------------------------------------------------------------------------|---------------------------------------|----------------------------|-------------------------|-----------------------|--------------------------|--------------------|----------------------------------|
| DH1    | bluish gray 10B5/1                                               | clayey<br>siltstone | bare rock with pond<br>scum                                                            | 0.2                                   | 57                         | 15                      | 20.4 ± 5.2            | 50.3                     | 100 ± 0            | 2.59                             |
| DH2    | bluish gray 10B5/1                                               | clayey<br>siltstone | bare rock with pond<br>scum                                                            | 0.3                                   | 53                         | 15                      | 35.0 ± 4.6            | 40.1                     | 99.8 ± 46.6        | 2.60                             |
| DH3    | bluish gray 10B5/1                                               | clayey<br>siltstone | bare rock with pond<br>scum                                                            | 0.3                                   | 50.6                       | 15                      | 24.8 ± 6.2            | 48.6                     | 99.2 ± 40.2        | 2.60                             |
| DH4    | bluish gray 10B5/1                                               | clayey<br>siltstone | bare rock with pond<br>scum                                                            | 0.3                                   | 41                         | 15                      | 29.8 ± 7.0            | 43.6                     | 94.9 ± 40.8        | 2.57                             |
| DH5    | bluish gray 10B5/1                                               | clayey<br>siltstone | blackberry ( <i>Rubus</i> ),<br>anise ( <i>Daucus</i> ) and<br>willow ( <i>Salix</i> ) | 1.3                                   | 28.5                       | 15                      | 17.2 ± 9.6            | 63.5                     | 100 ± 0            | 2.58                             |
| DH6    | bluish gray 10B5/1                                               | clayey<br>siltstone | blackberry ( <i>Rubus</i> ),<br>anise ( <i>Daucus</i> ) and<br>willow ( <i>Salix</i> ) | 2.1                                   | 26                         | 15                      | 13.9 ± 4.3            | 69.3                     | 100 ± 0            | 2.55                             |
| DH7    | olive gray 5Y5/2 with<br>ferrans olive brown<br>2.5YR4/4         | clayey<br>siltstone | blackberry ( <i>Rubus</i> ),<br>anise ( <i>Daucus</i> ) and<br>willow ( <i>Salix</i> ) | 3.0                                   | 21.6                       | 12.5                    | 12.0 ± 4.5            | 55.8                     | 75.6 ± 29.5        | 2.52                             |
| DH8    | olive gray 5Y5/2 with<br>ferrans olive brown<br>2.5YR4/4         | clayey<br>siltstone | blackberry ( <i>Rubus</i> ),<br>anise ( <i>Daucus</i> ) and<br>willow ( <i>Salix</i> ) | 3.5                                   | 19.5                       | 12.5                    | 10.2 ± 0.5            | 65.6                     | 75.7 ± 25.6        | 2.54                             |
| DH9    | olive gray 5Y5/2 with<br>ferrans olive brown<br>2.5YR4/4         | clayey<br>siltstone | blackberry ( <i>Rubus</i> ),<br>anise ( <i>Daucus</i> ) and<br>willow ( <i>Salix</i> ) | 4.0                                   | 18.3                       | 12.5                    | 10.6 ± 2.0            | 62.7                     | 79.4 ± 23.5        | 2.55                             |
| DH10   | olive gray 5Y5/2 with<br>ferrans olive brown<br>2.5YR4/4         | clayey<br>siltstone | blackberry ( <i>Rubus</i> ),<br>anise ( <i>Daucus</i> ) and<br>willow ( <i>Salix</i> ) | 4.5                                   | 17.1                       | 12.5                    | 10 ± 0                | 58.9                     | 52.7 ± 32.7        | 2.54                             |
| DH11   | olive gray 5Y5/2 with<br>ferrans olive brown<br>2.5YR4/4         | clayey<br>siltstone | blackberry ( <i>Rubus</i> ),<br>anise ( <i>Daucus</i> ) and<br>willow ( <i>Salix</i> ) | 5.8                                   | 14.4                       | 12.5                    | 10 ± 0                | 43.6                     | 81.4 ± 38.6        | 2.55                             |
| DH12   | olive gray 5Y5/2 with<br>ferrans dark yellowish<br>brown 10YR4/4 | clayey<br>siltstone | grassy slope with<br>poison oak                                                        | 9.1                                   | 11.8                       | 10                      | 10 ± 0                | 44.8                     | 72.4 ± 22.1        | 2.58                             |
| DH13   | olive gray 5Y5/2 with<br>ferrans dark yellowish<br>brown 10YR4/4 | clayey<br>siltstone | grassy slope with<br>poison oak                                                        | 11.7                                  | 9.4                        | 10                      | 10.6 ± 1.7            | 55.9                     | 73.8 ± 30.7        | 2.58                             |
| DH14   | olive gray 5Y5/2 with<br>ferrans dark yellowish<br>brown 10YR4/4 | clayey<br>siltstone | grassy slope with<br>poison oak                                                        | 14.2                                  | 8.1                        | 10                      | 10.4 ± 1.4            | 48.1                     | 67.2 ± 35.5        | 2.56                             |
| DH15   | olive gray 5Y5/2 with<br>ferrans strong brown<br>7.5YR5/6        | clayey<br>siltstone | grassy slope with<br>poison oak                                                        | 16.0                                  | 5.7                        | 10                      | 10 ± 0                | 49                       | 83.2 ± 24.4        | 2.54                             |

**Note:** Vertical levels are relative to river levels a Days Creek at 11.00 hrs 18-Jul-2010, with vertical and horizontal distances measured with level and tape. Munsell hues show redness with lower values on a scale in which 5Y is 15 and 5YR is 5. Schmidt recoil values (R) and percentage size change after 104 cycles of slaking experiment are given as mean and standard deviation. Bulk densities were measured using the clod method<sup>13</sup> and have standard deviation of 0.02 g.cm<sup>-3</sup>.

# GSA Data Repository item 2012153

**Table 5.** Field and analytical data for samples of sandstone from Days Creek, Oregon.

| Sample | Munsell color                                                    | Rock                                        | Vegetation zones                                                                       | Level vs. water<br>18-Jul-2010<br>(m) | Horizontal<br>distance (m) | Ferran hue<br>(Munsell) | Schmidt<br>recoil (R) | Pre-slaking size<br>(mm) | Slaked size<br>(%) | Density<br>(g.cm <sup>-3</sup> ) |
|--------|------------------------------------------------------------------|---------------------------------------------|----------------------------------------------------------------------------------------|---------------------------------------|----------------------------|-------------------------|-----------------------|--------------------------|--------------------|----------------------------------|
| DS1    | bluish gray 10B5/1                                               | sandstone<br>band 20 cm<br>wide             | bare rock with pond<br>scum                                                            | 0.2                                   | 57                         | 15                      | 23.6 ± 8.3            | 52.7                     | 100 ± 54.1         | 2.61                             |
| DS2    | bluish gray 10B5/1                                               | hard<br>sandstone<br>nodules 30<br>cm thick | bare rock with pond<br>scum                                                            | 0.3                                   | 53                         | 15                      | 36.5 ± 11.8           | 66.7                     | 99.0 ± 69.4        | 2.65                             |
| DS3    | bluish gray 10B5/1                                               | hard<br>sandstone<br>nodules 30<br>cm thick | bare rock with pond<br>scum                                                            | 0.3                                   | 50.6                       | 15                      | 44.4 ± 5.4            | 58                       | 98.8 ± 69.3        | 2.64                             |
| DS4    | bluish gray 10B5/1                                               | hard<br>sandstone<br>nodules 15<br>cm thick | bare rock with pond<br>scum                                                            | 0.3                                   | 41                         | 15                      | 43.5 ± 6.5            | 57.5                     | 100 ± 0            | 2.62                             |
| DS5    | bluish gray 10B5/1                                               | sandstone<br>band 20 cm<br>wide             | blackberry ( <i>Rubus</i> ),<br>anise ( <i>Daucus</i> ) and<br>willow ( <i>Salix</i> ) | 1.3                                   | 28.5                       | 15                      | 23.1 ± 8.1            | 52.7                     | 100 ± 0            | 2.55                             |
| DS6    | bluish gray 10B5/1                                               | sandstone<br>band                           | blackberry ( <i>Rubus</i> ),<br>anise ( <i>Daucus</i> ) and<br>willow ( <i>Salix</i> ) | 2.1                                   | 26                         | 15                      | 13.4 ± 3.9            | 55.3                     | 98.4 ± 47.5        | 2.54                             |
| DS7    | olive gray 5Y5/2 with<br>ferrans olive brown<br>2.5YR4/4         | sandstone<br>band                           | blackberry ( <i>Rubus</i> ),<br>anise ( <i>Daucus</i> ) and<br>willow ( <i>Salix</i> ) | 3.0                                   | 21.6                       | 12.5                    | 10.5 ± 1.2            | 52.7                     | 100 ± 63.5         | 2.60                             |
| DS8    | olive gray 5Y5/2 with<br>ferrans olive brown<br>2.5YR4/4         | sandstone<br>band                           | blackberry ( <i>Rubus</i> ),<br>anise ( <i>Daucus</i> ) and<br>willow ( <i>Salix</i> ) | 3.5                                   | 19.5                       | 12.5                    | 11.9 ± 4.7            | 69.2                     | 100 ± 0            | 2.54                             |
| DS9    | olive gray 5Y5/2 with<br>ferrans olive brown<br>2.5YR4/4         | sandstone<br>band                           | blackberry ( <i>Rubus</i> ),<br>anise ( <i>Daucus</i> ) and<br>willow ( <i>Salix</i> ) | 4.0                                   | 18.3                       | 12.5                    | 10.5 ± 1.7            | 46.1                     | 100 ± 0            | 2.46                             |
| DS10   | olive gray 5Y5/2 with<br>ferrans dark yellowish<br>brown 10YR4/4 | sandstone<br>band                           | blackberry ( <i>Rubus</i> ),<br>anise ( <i>Daucus</i> ) and<br>willow ( <i>Salix</i> ) | 4.5                                   | 17.1                       | 12.5                    | 10.2 ± 0.9            | 53.7                     | 100 ± 0            | 2.65                             |
| DS12   | olive gray 5Y5/2 with<br>ferrans dark yellowish<br>brown 10YR4/4 | sandstone<br>band                           | grassy slope with<br>poison oak                                                        | 9.1                                   | 11.8                       | 10                      | 15.1 ± 7.9            | 52.5                     | 99.6 ± 55.5        | 2.40                             |
| DS14   | olive gray 5Y5/2 with<br>ferrans dark yellowish<br>brown 10YR4/4 | hard<br>sandstone<br>band 15 cm<br>thick    | grassy slope with<br>poison oak                                                        | 14.2                                  | 8.1                        | 10                      | 10.6 ± 1.7            | 54.1                     | 99.5 ± 55.7        | 2.45                             |
| DS15   | olive gray 5Y5/2 with<br>ferrans strong brown<br>7.5YR5/6        | hard<br>sandstone<br>band 15 cm<br>thick    | grassy slope with<br>poison oak                                                        | 16.0                                  | 5.7                        | 10                      | 10.8 ± 1.7            | 50.4                     | 99.9 ± 58.6        | 2.60                             |

**Note:** Vertical levels are relative to river levels a Days Creek at 11.00 hrs 18-Jul-2010, with vertical and horizontal distances measured with level and tape. Munsell hues show redness with lower values on a scale in which 5Y is 15 and 5YR is 5. Schmidt recoil values (R) and percentage size change after 104 cycles of slaking experiment are given as mean and standard deviation. Bulk densities were measured using the clod method<sup>13</sup> and have standard deviation of 0.02 g.cm<sup>-3</sup>.
